# Supplementary material for: IrOx–Pt electrode for the electro-oxidation of ethanol in alkaline-type direct ethanol fuel cells: an excellent CO-tolerant catalyst
Source: Royal Society of Chemistry journal article supplement (doi:10.1039/d3nj03306f), 2023-01-01
Supplement: d3nj03306f1.pdf [file d3nj03306f1.pdf]

### Supporting information

**Table S1. XPS binding energies, full-width at half-maximum (FWHM) values and area ratios of Ir 4f of IrO<sub>x</sub>-Pt.**

|               | IrO <sub>2</sub>  | IrO <sub>2</sub>  | Ir <sub>2</sub> O <sub>3</sub> | Ir <sub>2</sub> O <sub>3</sub> |
|---------------|-------------------|-------------------|--------------------------------|--------------------------------|
|               | 4f <sub>7/2</sub> | 4f <sub>5/2</sub> | 4f <sub>7/2</sub>              | 4f <sub>5/2</sub>              |
| Position / eV | 63.06             | 66.17             | 62.21                          | 65.21                          |
| FWHM / eV     | 2.61              | 2.57              | 1.27                           | 1.31                           |
| Area ratio    | 0.701             | 0.526             | 0.298                          | 0.223                          |

**Table S2. XPS binding energies, FWHM values and area ratios of O 1s of IrO<sub>x</sub>-Pt.**

|               | O <sup>2-</sup> | OH <sup>-</sup> | hydrating<br>H <sub>2</sub> O |
|---------------|-----------------|-----------------|-------------------------------|
| Position / eV | 530.46          | 531.62          | 533.37                        |
| FWHM / eV     | 1.85            | 1.75            | 2.82                          |
| Area ratio    | 0.458           | 0.490           | 0.0527                        |

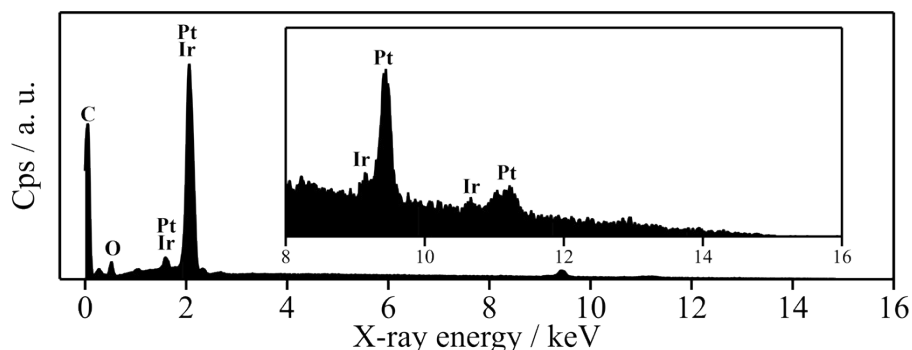

**Fig. S1. EDX spectrum of IrO<sub>x</sub>-Pt electrode. Inset: enlarged image of higher energy region.**

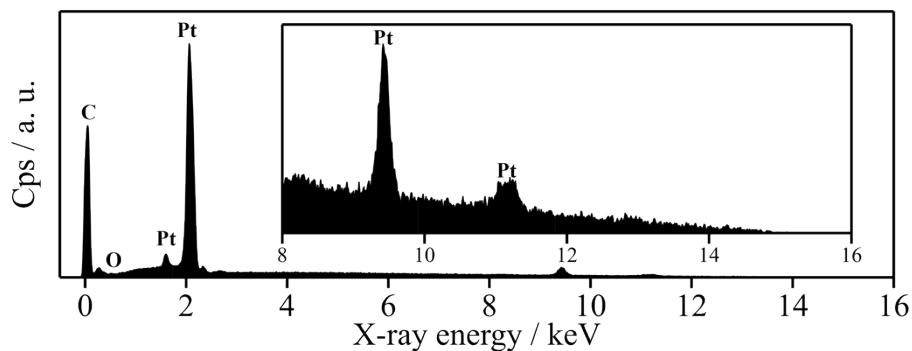

**Fig. S2. EDX spectrum of Pt electrode. Inset: enlarged image of higher energy region.**

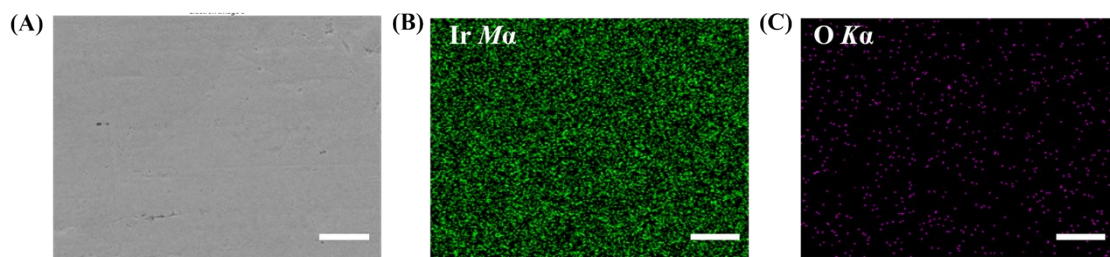

**Figure S3.** (A) SEM image of Pt electrode, same as Fig. 3(A). (B) and (C) 2D elemental mapping of (B) Ir and (C) O with the same field of view as (A). Scale bar: 5  $\mu\text{m}$  for all panels.

**Table S3.** Atomic compositions of (left) before and (right) after  $\text{IrO}_x$  deposition on Pt.

|    | Before<br>deposition | After<br>deposition |
|----|----------------------|---------------------|
|    | Atomic%              | Atomic%             |
| C  | 53.37                | 37.02               |
| O  | 4.54                 | 34.06               |
| Ir | 0.00                 | 3.12                |
| Pt | 41.99                | 25.80               |

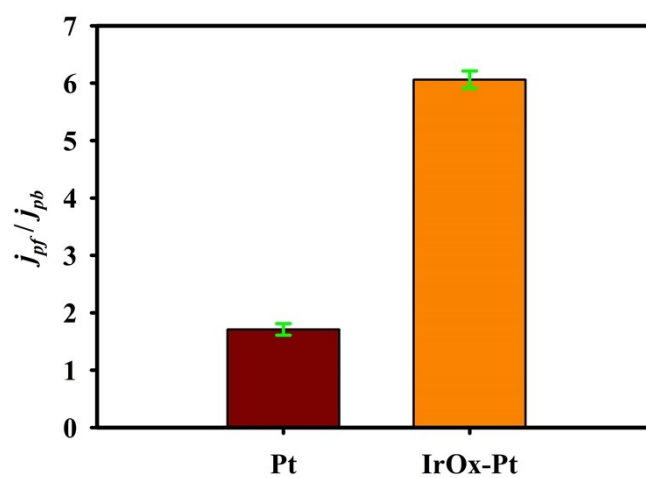

**Figure S4.** Ratio of anodic and cathodic peak current density of bare Pt and  $\text{IrO}_x\text{-Pt}$  obtained from Fig. 4(A) & (B).

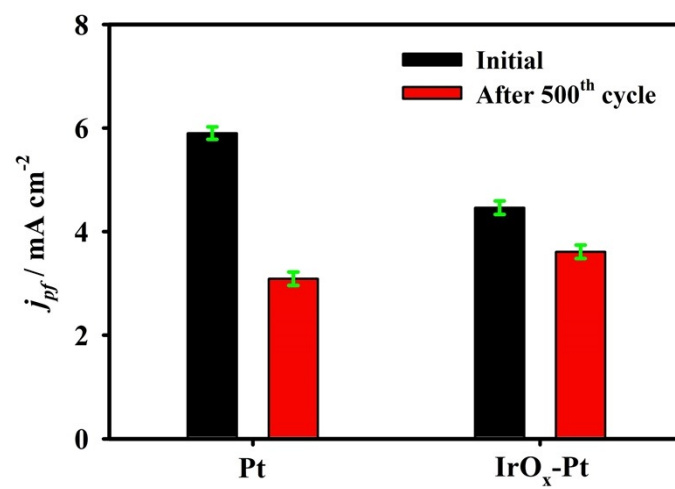

**Figure S5. Comparison of anodic peak current densities obtained initially and after 500 incessant cycles by both bare Pt and  $\text{IrO}_x\text{-Pt}$  (extracted from Fig. 7(A) & (B)).**
